# Supplementary material for: Management of Out-of-Hospital Cardiac Arrest during COVID-19: A Tale of Two Cities
Source: MDPI journal article supplement (doi:10.3390/jcm11175177), 2022-09-01
Supplement: s1 [file s1]

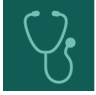

# SUPPLEMENTAL DATA

(a) Singapore

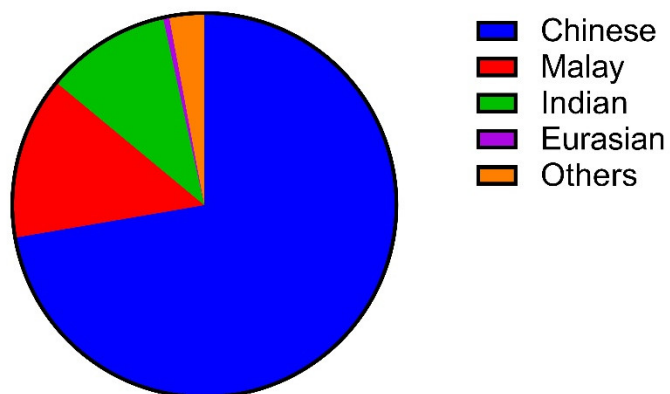**Singapore (n=1975)**

(b) Atlanta

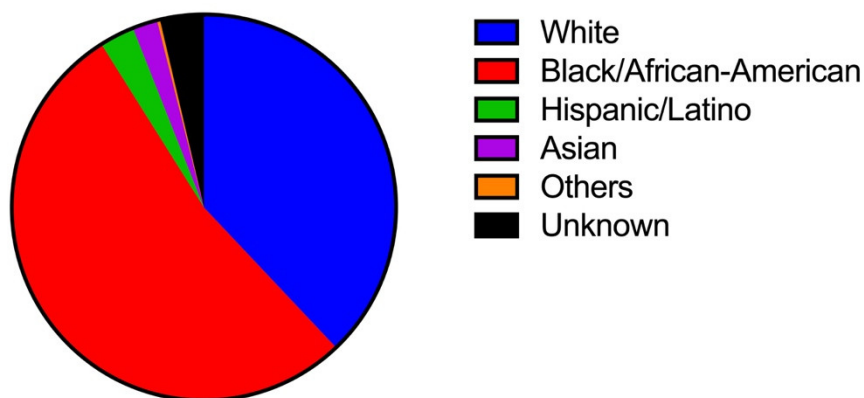**Atlanta (n=2009)**

**Supplemental Figure S1.** Racial distribution of adult, EMS-treated OHCA. Abbreviations: EMS, Emergency Medical Services; OHCA, out-of-hospital cardiac arrest.

**Supplemental Table S1.** Characteristics of EMS-treated OHCA and outcome, by city, location of arrest and period.

|                                                    |                   |                       |                   |                       |
|----------------------------------------------------|-------------------|-----------------------|-------------------|-----------------------|
| (a): Singapore                                     | Singapore         |                       |                   |                       |
|                                                    | Home/Residential  |                       | Public Areas      |                       |
|                                                    | Pandemic<br>N=808 | Pre-Pandemic<br>N=724 | Pandemic<br>N=105 | Pre-Pandemic<br>N=155 |
| <b>Demographics</b>                                |                   |                       |                   |                       |
| Age in years, median [Q1, Q3]                      | 75.0 [63.0, 84.0] | 73.0 [62.0, 84.0]     | 56.0 [50.0, 64.0] | 59.0 [50.0, 69.0]     |
| Male gender, n (%)                                 | 489 (60.5%)       | 420 (58.0%)           | 98 (93.3%)        | 131 (84.0%)           |
| <b>Event information, n (%)</b>                    |                   |                       |                   |                       |
| Presumed cardiac aetiology                         | 735 (91.0%)       | 638 (88.1%)           | 98 (93.3%)        | 145 (93.5%)           |
| Initial shockable rhythm                           | 106 (13.1%)       | 87 (12.0%)            | 39 (37.1%)        | 59 (38.1%)            |
| Witnessed arrest                                   |                   |                       |                   |                       |
| - Unwitnessed                                      | 345 (42.7%)       | 424 (58.6%)           | 30 (28.6%)        | 58 (37.4%)            |
| - Bystander witnessed                              | 384 (47.5%)       | 229 (31.6%)           | 59 (56.2%)        | 84 (54.2%)            |
| - EMS witnessed                                    | 79 (9.8%)         | 71 (9.8%)             | 16 (15.2%)        | 13 (8.4%)             |
| <b>Pre-hospital resuscitation, n (%)</b>           |                   |                       |                   |                       |
| Bystander CPR                                      | 458(62.8%)        | 440 (67.4%)           | 53 (59.6%)        | 98 (69.0%)            |
| Pre-hospital defibrillation                        | 152 (18.8%)       | 127 (17.5%)           | 52 (49.5%)        | 90 (58.1%)            |
| <b>EMS response times in min, median [Q1, Q3]*</b> |                   |                       |                   |                       |
| EMS response time                                  | 8.62 [6.91, 10.4] | 7.93 [6.55, 9.59]     | 9.28 [7.30, 11.2] | 8.87 [6.66, 11.5]     |
| Total response time                                | 12.9 [10.8, 15.2] | 11.1 [9.38, 13.2]     | 12.2 [10.2, 15.7] | 12.3 [9.53, 15.2]     |
| - Call received to dispatch                        | 1.97 [1.43, 2.72] | 2.08 [1.57, 2.70]     | 2.33 [1.77, 3.48] | 2.32 [1.68, 3.31]     |
| - Dispatch to scene arrival                        | 6.37 [4.93, 8.10] | 5.87 [4.58, 7.48]     | 6.43 [4.97, 8.95] | 6.50 [4.46, 9.03]     |
|                                                    | 4.03 [2.85, 5.57] | 2.93 [1.83, 4.00]     | 3.33 [1.32, 5.33] | 2.17 [0.992, 4.22]    |

|                                           |                   |                       |                   |                       |
|-------------------------------------------|-------------------|-----------------------|-------------------|-----------------------|
| - Scene arrival to patient's side         |                   |                       |                   |                       |
| Time at scene                             | 25.3 [21.9, 29.0] | 23.7 [20.8, 27.2]     | 22.5 [17.6, 26.2] | 20.3 [16.6, 23.6]     |
| <b>Patient outcomes, n(%)**</b>           |                   |                       |                   |                       |
| Transported                               | 713 (88.2%)       | 670 (92.3%)           | 104 (99.0%)       | 155 (100%)            |
| Survived to hospital admission            | 92 (11.4%)        | 96 (13.3%)            | 24 (22.9%)        | 57 (36.8%)            |
| Survived to hospital discharge            | 21 (2.6%)         | 27 (3.7%)             | 13 (12.4%)        | 29 (18.7%)            |
| Discharged with good neurological outcome | 16 (2.0%)         | 22 (3.0%)             | 12 (11.4%)        | 29 (18.7%)            |
| (b): Atlanta                              |                   |                       |                   |                       |
|                                           | Atlanta           |                       |                   |                       |
|                                           | Home/Residential  |                       | Public Areas      |                       |
|                                           | Pandemic<br>N=792 | Pre-Pandemic<br>N=620 | Pandemic<br>N=90  | Pre-Pandemic<br>N=138 |
| <b>Demographics</b>                       |                   |                       |                   |                       |
| Age in years, median [Q1,Q3]              | 65.0 [53.0, 76.0] | 65.5 [53.0, 70.0]     | 52.5 [45.0, 63.0] | 60.0 [44.0, 69.0]     |
| Male gender, n(%)                         | 413 (52.1%)       | 345 (55.6%)           | 74 (82.2%)        | 104 (75.4%)           |
| <b>Event information, n(%)</b>            |                   |                       |                   |                       |
| Presumed cardiac aetiology                | 668 (84.3%)       | 540 (87.1%)           | 75 (83.3%)        | 124 (89.9%)           |
| Initial shockable rhythm                  | 114 (14.4%)       | 104 (16.8%)           | 34 (37.8%)        | 52 (37.7%)            |
| Witnessed arrest                          |                   |                       |                   |                       |
| - Unwitnessed                             | 372 (47.0%)       | 290 (46.8%)           | 31 (34.4%)        | 42 (30.4%)            |
| - Bystander witnessed                     | 293 (37.0%)       | 231 (37.3%)           | 45 (50.0%)        | 81 (58.7%)            |
| - EMS witnessed                           | 127 (16.0%)       | 99 (16.0%)            | 14 (15.6%)        | 15 (10.9%)            |

|                                                   |                     |                     |                     |                     |
|---------------------------------------------------|---------------------|---------------------|---------------------|---------------------|
| <b>Pre-hospital resuscitation, n(%)</b>           |                     |                     |                     |                     |
| Bystander CPR                                     | 280 (35.4%)         | 196 (37.6%)         | 29 (32.2%)          | 69 (56.1%)          |
| Pre-hospital defibrillation                       | 196 (24.7%)         | 162 (26.1%)         | 47 (52.2%)          | 68 (49.3%)          |
| <b>EMS response times in min, median [Q1,Q3]*</b> |                     |                     |                     |                     |
| EMS response time                                 | 9.77 [6.93, 12.7]   | 9.15 [6.68,12.2]    | 8.19 [6.01, 10.9]   | 8.52 [6.00, 12.0]   |
| Total response time                               | 11.5 [9.00, 15.0]   | 11.0 [8.39, 14.0]   | 9.94 [7.68, 14.2]   | 10.0 [6.75, 13.8]   |
| - Call received to dispatch                       | 0.583 [0.125, 1.13] | 0.633 [0.100, 1.47] | 0.633 [0.200, 1.17] | 0.850 [0.296, 1.95] |
| - Dispatch to scene arrival                       | 8.48 [6.00, 11.4]   | 8.00 [5.72, 11.0]   | 7.18 [5.00, 9.19]   | 7.00 [4.20, 9.55]   |
| - Scene arrival to patient's side                 | 1.53 [0.950, 2.77]  | 1.22 [0.817, 2.02]  | 1.23 [0.929, 2.03]  | 1.00 [0.517, 1.91]  |
| Time at scene                                     | 23.2 [18.0, 31.3]   | 20.5 [15.3, 27.2]   | 20.5 [14.0, 27.0]   | 18.5 [12.9, 23.1]   |
| <b>Patient outcomes, n (%)**</b>                  |                     |                     |                     |                     |
| Transported                                       | 601 (75.9%)         | 552 (89.0%)         | 89 (98.9%)          | 134 (97.1%)         |
| Survived to hospital admission                    | 138 (17.6%)         | 136 (21.9%)         | 37 (43.0%)          | 47 (34.1%)          |
| Survived to hospital discharge                    | 47 (6.01%)          | 46 (7.4%)           | 20 (23.3%)          | 22 (15.9%)          |
| Discharged with good neurological outcome         | 31 (4.0%)           | 34 (5.5%)           | 16 (18.6%)          | 18 (13.0%)          |

Numbers are n (%) for categorical variables and median (Q1-Q3) for continuous variables.

\*Data from Atlanta are not available for: 660 (40.2%) call received to dispatch; 385 (23.5%) dispatch to scene arrival; 668 (40.7%) scene arrival to patient's side; 655 (39.9%) EMS response time; 658 (40.1%) total response time; 573 (34.9%) scene time.

\*Data from Singapore are not available for: 153 (8.5%) scene time.

\*\*Data for survival to hospital discharge are not available for 1 patient from Singapore and 14 patients from Atlanta.

Abbreviations: EMS, emergency medical services; OHCA, out-of-hospital cardiac arrest; CPR, cardiopulmonary resuscitation
